# Supplementary material for: Dielectric and electrochemical performance of rhombohedral lanthanum manganite perovskite nanostructures
Source: Royal Society of Chemistry journal article supplement (doi:10.1039/d2nj04213d), 2022-01-01
Supplement: d2nj04213d1.pdf [file d2nj04213d1.pdf]

## New Journal of Chemistry

### Supplementary Information

#### **Dielectric and Electrochemical Performance of Rhombohedral Lanthanum Manganate Perovskite Nanostructure**

Manju V <sup>a, b</sup>, Rohith R <sup>a, b</sup>, Anandhu T. P <sup>a, b</sup>, Bhavija B.V <sup>a, b</sup>, Sreekanth J. Varma <sup>a, b\*</sup>

<sup>a</sup> Materials for Energy Storage and Optoelectronic Devices Laboratory, Department of Physics, Sanatana Dharma College, University of Kerala, Alappuzha, Kerala-688003, India

<sup>b</sup> Research Centre, University of Kerala, Thiruvananthapuram, Kerala-695034, India

\*Corresponding author: [sjv@sdcollege.in](mailto:sjv@sdcollege.in)

### Tables

Table S1: 2 theta and corresponding (h k l) planes from the XRD spectra of LaMnO<sub>3</sub> samples.

| 2 Theta (degree) | (h k l)   | 2 Theta (degree) | (h k l)   |
|------------------|-----------|------------------|-----------|
| 22.8             | (1 0 -2)  | 52.8             | (2 -1 6)  |
| 32.4             | (2 -1 0)  | 58               | (3 0 0)   |
| 32.7             | (1 0 4)   | 58.6             | (1 0 -8)  |
| 38.4             | (2 -1 3)  | 67.8             | (4 -2 0)  |
| 40               | (2 0 2)   | 68.6             | (2 0 8)   |
| 40.6             | (0 0 6)   | 77.4             | (4 -1 -4) |
| 46.7             | (2 0 -4)  | 77.9             | (3 -1 -8) |
| 52.3             | (3 -1 -2) |                  |           |

## Figures

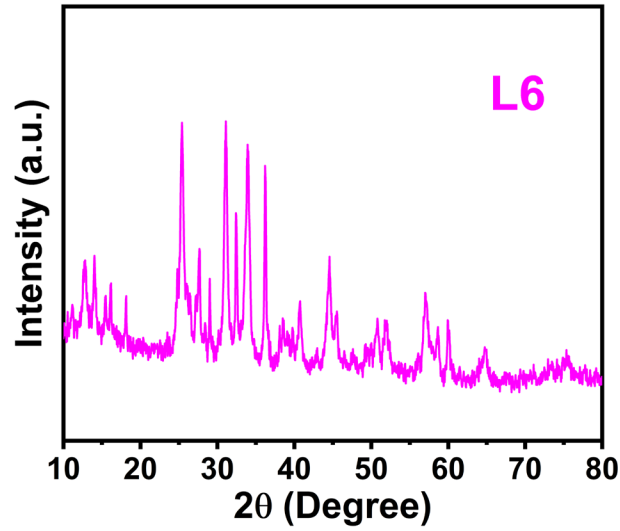

Figure S1. XRD spectrum of L6 sample.

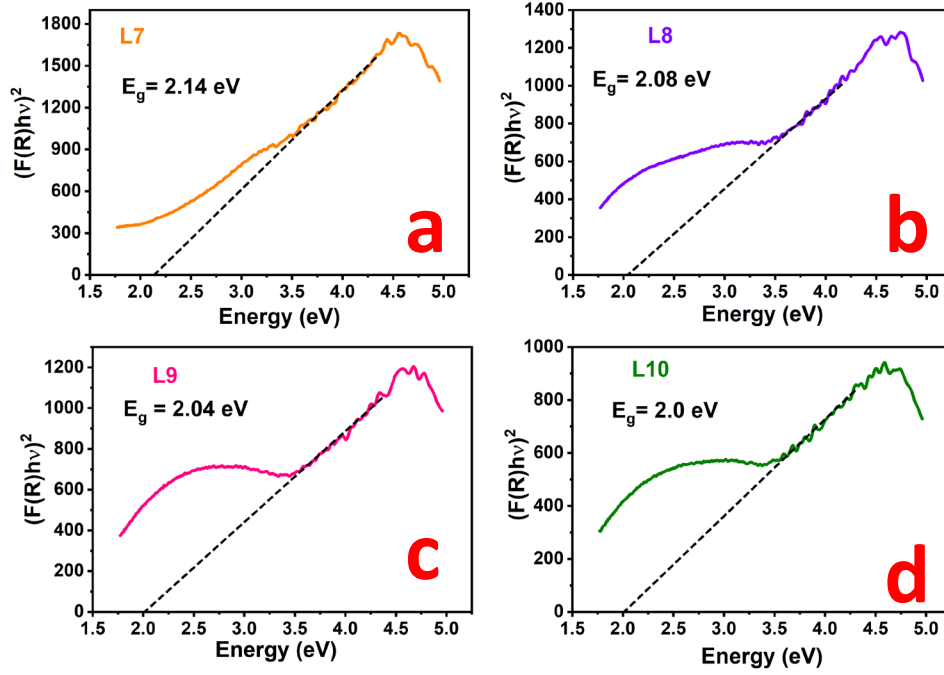

**Figure S2.**  $(F(R)h\nu)^2$  versus  $h\nu$  plot for direct band gap of  $\text{LaMnO}_3$  samples annealed at different temperatures (a) L7, (b) L8, (c) L9 and (d) L10

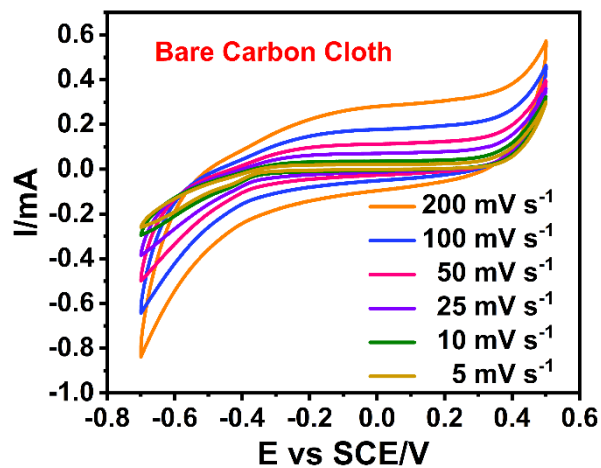

**Figure S3.** Cyclic voltammetry curves of bare carbon cloth at different scan rates.

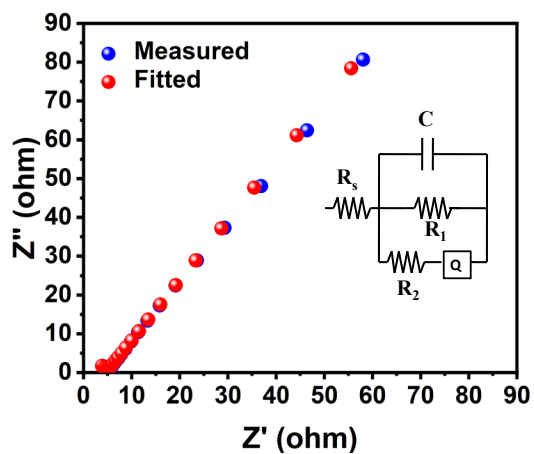

**Figure S4.** Measured and Fitted Nyquist plot for L7 electrode (inset- equivalent circuit)

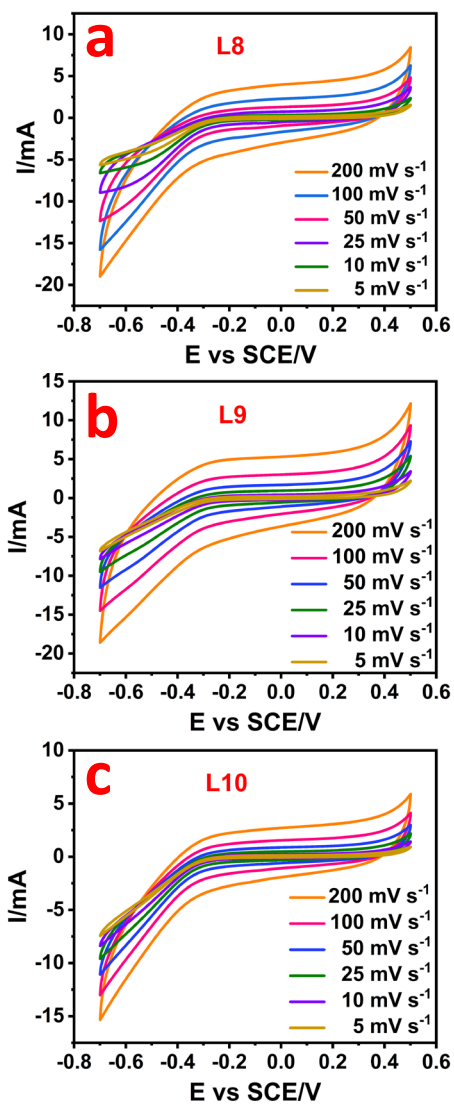

Figure S5. Cyclic Voltammetry curves of LaMnO<sub>3</sub> samples (a) L8, (b) L9 and (c) L10.

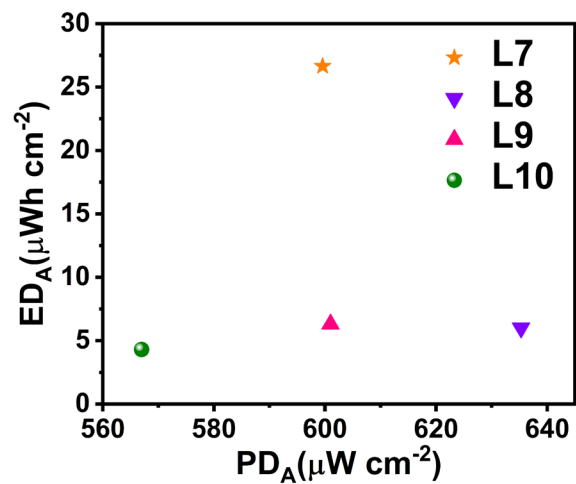

Figure S6. Ragone plot of different LaMnO<sub>3</sub> samples.

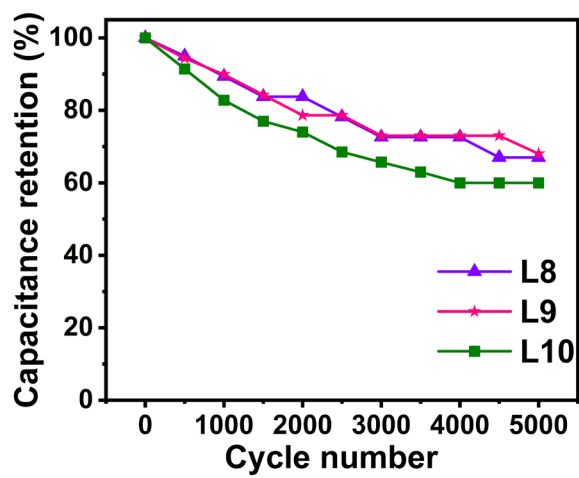

Figure S7. Cycling stability of L8, L9 and L10 samples.
